# Supplementary material for: pH-Sensitive Chitosan Nanoparticles for Salivary Protein Delivery
Source: Nanomaterials (Basel). 2021 Apr 17;11(4):1028. doi: 10.3390/nano11041028 (PMC8073935; doi:10.3390/nano11041028)
Supplement: Supplementary file 1 [file nanomaterials-11-01028-s001.zip › nanomaterials-1167974-supplementary.pdf]

**Supporting information for:**

## **pH-Sensitive Chitosan Nanoparticles for Salivary Protein Delivery**

**Yi Zhu <sup>1</sup>, Lina Marin <sup>2</sup>, Yizhi Xiao <sup>3</sup>, Elizabeth R. Gillies <sup>1,4</sup> and Walter L. Siqueira <sup>2,\*</sup>**

<sup>1</sup> School of Biomedical Engineering, The University of Western Ontario, 1151 Richmond Street, London, ON N6A 3K7, Canada

<sup>2</sup> College of Dentistry, University of Saskatchewan, 105 Wiggins Rd, Saskatoon, SK S7N 5E4, Canada

<sup>3</sup> Schulich Medicine and Dentistry, The University of Western Ontario, 1151 Richmond Street, London, ON N6A 5C1, Canada

<sup>4</sup> Department of Chemistry, Department of Chemical and Biochemical Engineering, The University of Western Ontario, 115 Richmond Street, London, ON, N6A 5B7

\* Correspondence: walter.siqueira@usask.ca

# Ultra-low MW CNs at chitosan to TPP mass ratio of 6.94

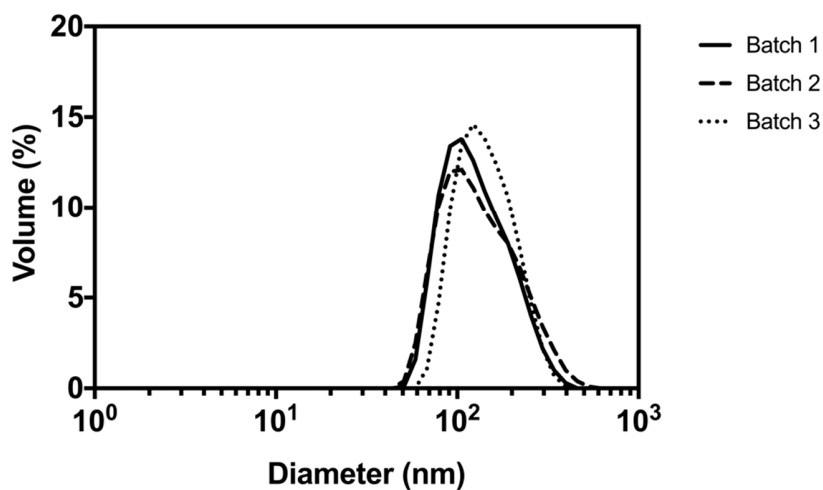

**Figure S1.** Volume distribution of the ultra-low MW CNs at chitosan to TPP mass ratio of 6.94. There is a small batch to batch variability.

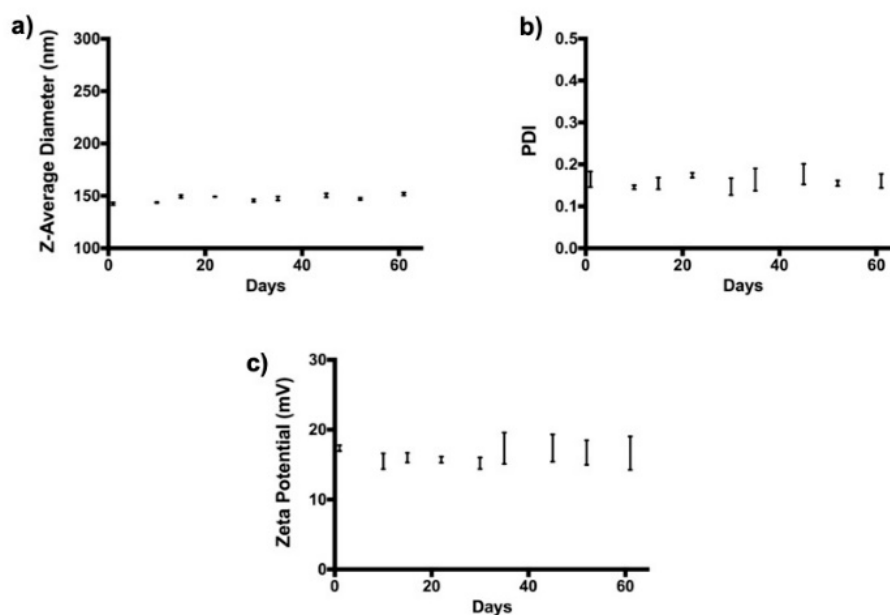

**Figure S2.** CNs were stored at 4°C, and three parameters including (a) Z-average diameter, (b) PDI, and (c) Zeta potential were measured by DLS routinely over the course of 60 days. The consistency of obtained data suggest the nanoparticles are stable.

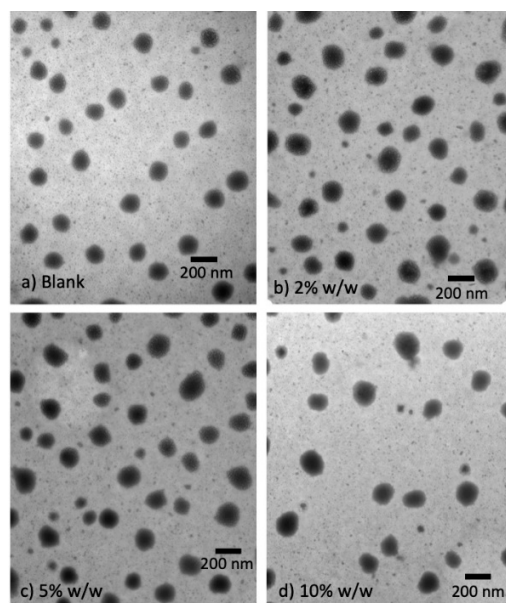

**Figure S3.** TEM images of (a) blank chitosan nanoparticles, (b) HTN3 loaded chitosan nanoparticles with a 2% w/w loading ratio, (c) HTN3 loaded chitosan nanoparticles with a 5% w/w loading ratio, and (d) HTN3 loaded chitosan nanoparticles with a 10% w/w loading ratio. No significant variance in size or dispersity was observed among blank chitosan nanoparticles and those with different loading ratios.

**Table S1.** Protein degradation over time for free HTN3 and HTN3-loaded into CNs.

| Time (h) | Remaining HTN3 (%) |                 |
|----------|--------------------|-----------------|
|          | Free HTN3          | HTN3-loaded CNs |
| 0        | 100                | 100             |
| 0.1      | 82 ± 9             | 79 ± 8          |
| 0.5      | 34 ± 18            | 78 ± 9          |
| 1        | 18 ± 12            | 63 ± 2          |
| 2        | 6 ± 5              | 47 ± 8          |
| 3        | 1 ± 1              | 29 ± 8          |
| 6        | 0                  | 7 ± 1           |
